# Supplementary material
Source: PubMed Central journal article supplement (PMC3911503)
Supplement: MCB.00612-13_zmb999100283so3.pdf [file MCB.00612-13_zmb999100283so3.pdf]

# Supplementary Figure S3

```
ets1 -----MKAAVDLKPTLTIK-----TEKVDLELFP-----S 26
ets2 MNDFGIKNMDQVAPVANSFRGTLKRQPAFDTFDGS LFAVLPSLSEDTLQEVPTGLDSVS 60
      :.:.:. :*:. :. :*. *: .* *
```

  

```
ets1 PDMECADVPLLTPSSKEMMSQALKATFSGFTKEQQRLGIPKDPRQWTETHVRDWMWAVN 86
ets2 HDSASCELPLLTPCSKAVMSQALKATFSGFQKEQRRLLGIPKNPWLWSEQQVCQWLLWATN 120
      * ..::*****.** :***** ***** **:******;* *: * :*:***.*
```

  

```
ets1 EFSLKGVDFQKFCMSGAALCALGKECFLELAPDFVGDILWEHLEILQKEDVKPYQVNGAN 146
ets2 EFSLVNVNLHQFGMNGQMLCNLGKERFLELAPDFVGDILWEHLEQMIKENQE--KTEDQY 178
      **** .*::::* *. * ** **** ***** : **: : :..
```

  

```
ets1 PTYPESCYTSDYFISYGIEHAQCVPPEFSEPSFITESYQTLHPISSEELLSLKYENDYP 206
ets2 EENSHLNAVQPWINSNTLGF SMEQAPYGMQAPNYPKDNLLDSMCPPSATPAALGSE---- 234
      .. ..::: * : :. *. :. *.: :. . * : * *
```

  

```
ets1 SVILQDPLQTDTLQTDYFAIKQEVLTDPNMCLGRASRGKLGQDSFES-VESYDSCDRLT 265
ets2 -LQMLPKSRLNTVNVNYCSISQDFPS-SNVNLLNNSGKPKDHDSPENGGDSFESSDLL 292
      : : : :*:::* :*. * . : .*: * . . ** .:** * . :*:*. * *
```

  

```
ets1 QSWSSQSSFNLSLQRVPSYDSFDYEDYPAALPNHKPKGTFKDYVRDRAD-LNKDKPVIPAA 324
ets2 RSWNSQSSLLDVQRVPSFESFE-EDCSQSLCLSKLTMSFKDYIQERSDPVEQGKPVIPAA 351
      :**.***:* :.***:*:**: ** . : * * . :*****::**:* :*:*****
```

  

```
ets1 ALAGYTGSGPIQLWQFLLELLTDKSCQSFI SWTGDGWEFKLSDPDEVARRWGKRKNKPKM 384
ets2 VLAGFTGSGPIQLWQFLLELLSDKSCQSFI SWTGDGWEFKLADPDEVARRWGKRKNKPKM 411
      .***:*****:*****:*****:*****:*****:*****
```

  

```
ets1 NYEKLRSGLRYYYYDKNIIHKTAGKRYVYRFVCDLQSL LGYTPEELHAML DVKPDAD- 440
ets2 NYEKLRSGLRYYYYDKNIIHKTS GKRYVYRFVCDLQNL LGFTPEELHAILGVQPDTE 468
      *****:*****:*****.***:*****:*. * : * ::
```
