# Supplementary material
Source: PubMed Central journal article supplement (PMC3911503)

(A)

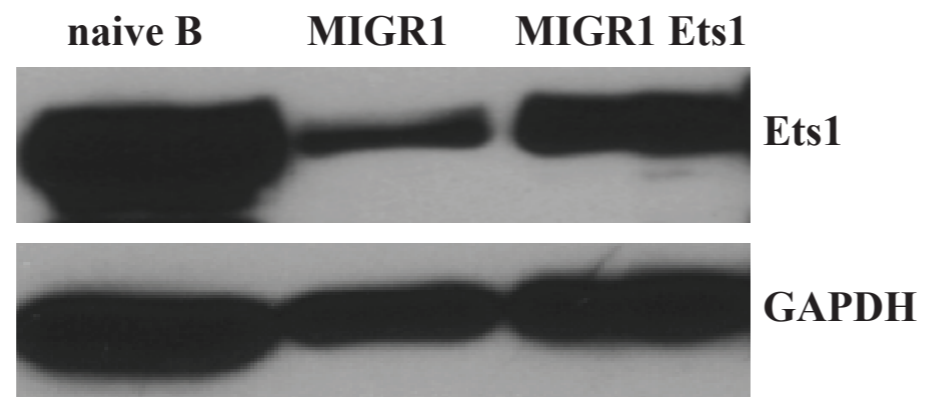

(B)

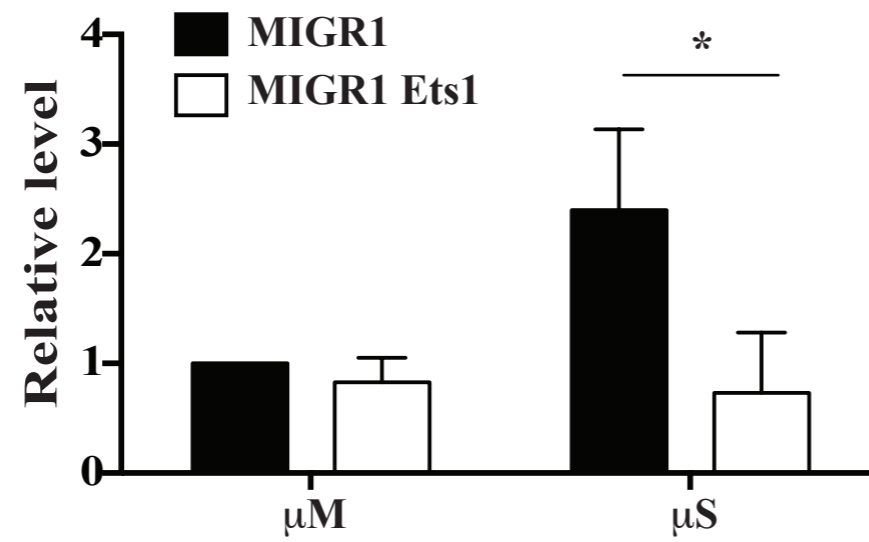

Supplement: MCB.00612-13_zmb999100283so1.pdf [file MCB.00612-13_zmb999100283so1.pdf]

(A)

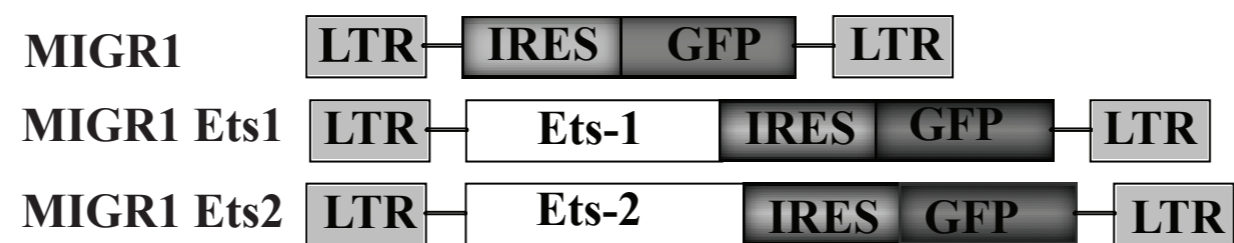

(B)

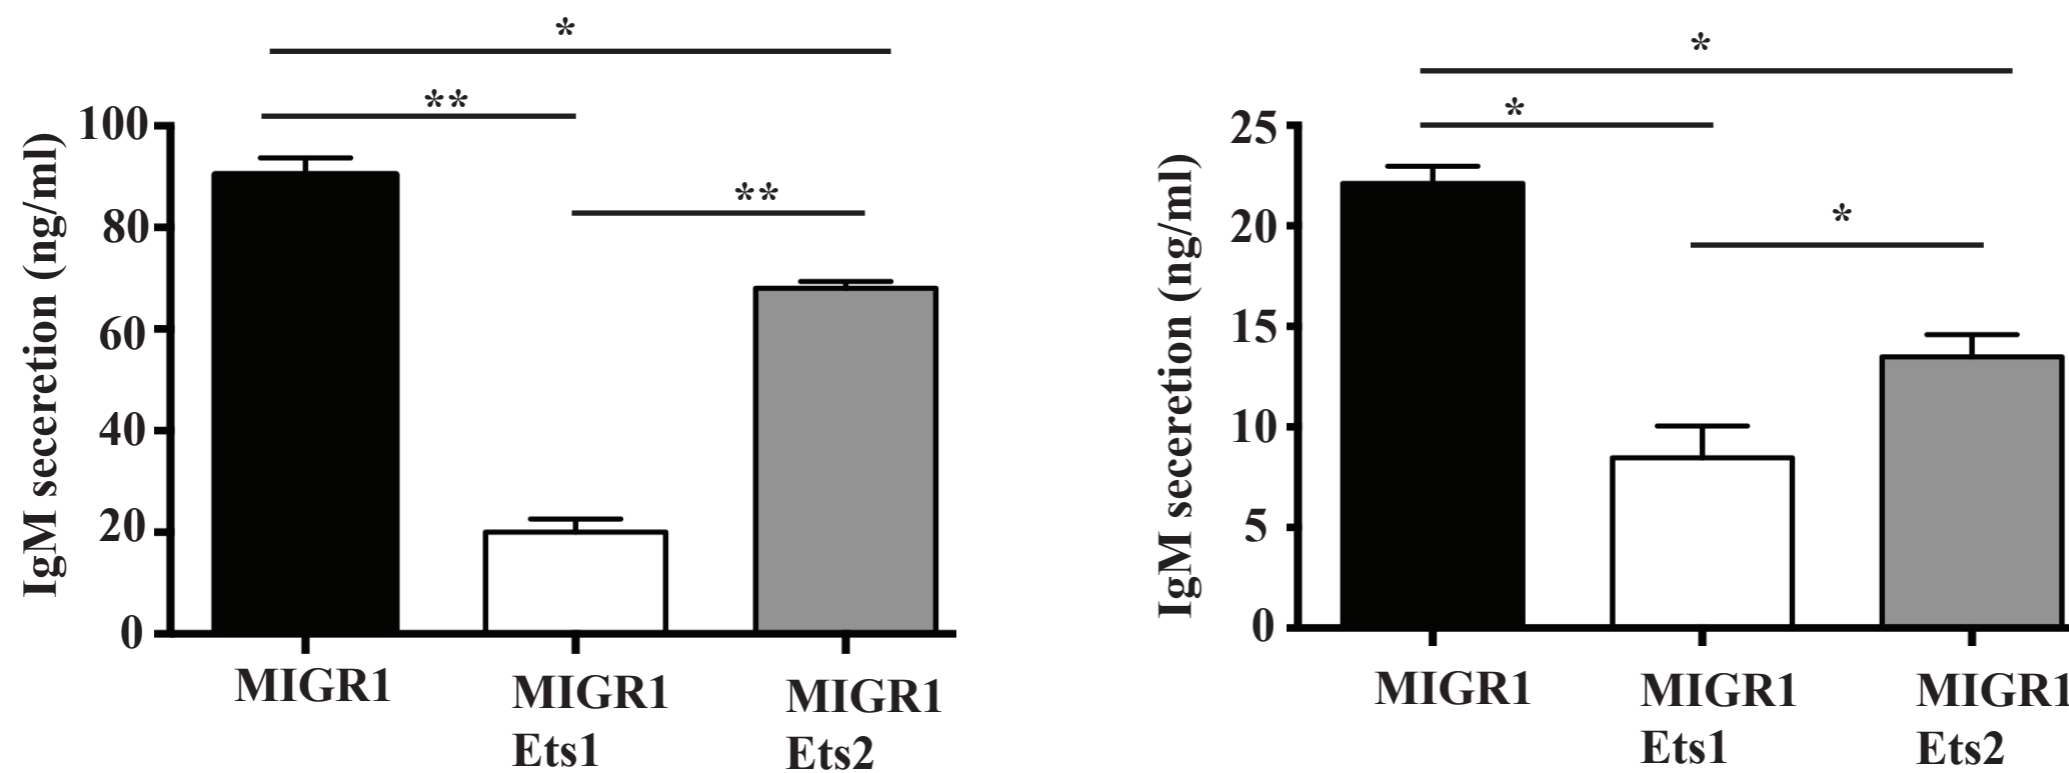

Supplement: MCB.00612-13_zmb999100283so2.pdf [file MCB.00612-13_zmb999100283so2.pdf]

(A)

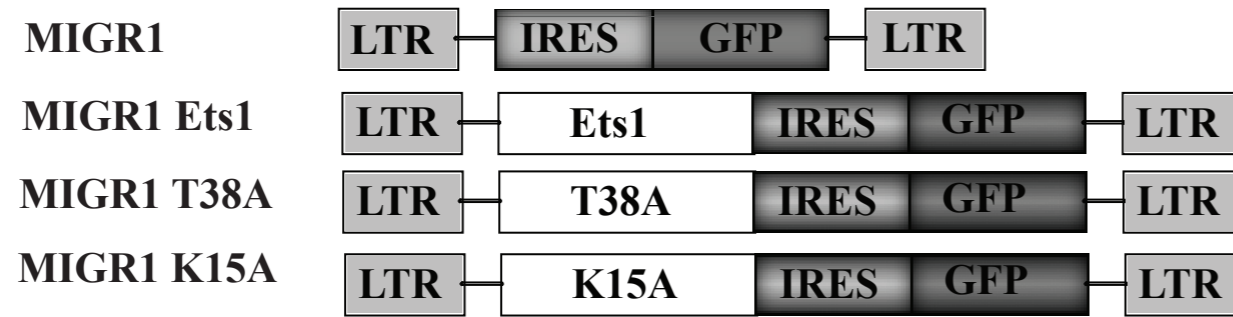

(B)

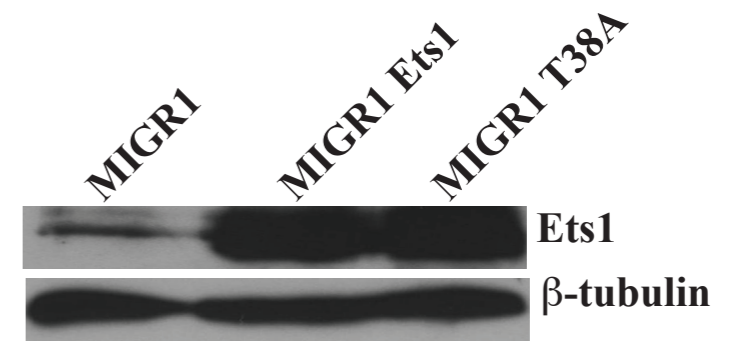

(C)

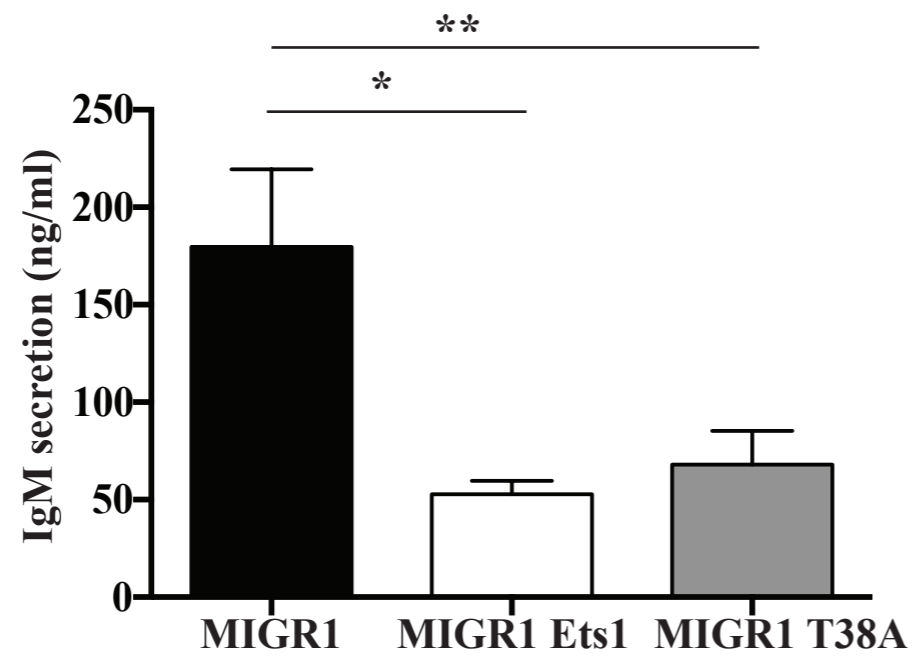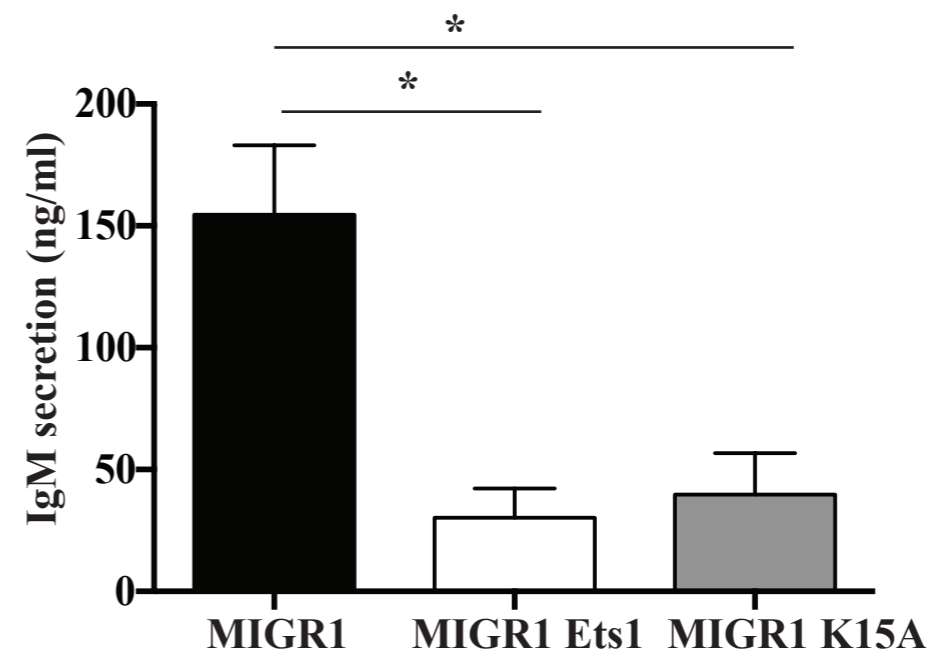

Supplement: MCB.00612-13_zmb999100283so4.pdf [file MCB.00612-13_zmb999100283so4.pdf]
